# Supplementary material
Source: PubMed Central journal article supplement (PMC10949507)
Supplement: jvi.01660-23-s0001.pdf [file jvi.01660-23-s0001.pdf]

# **Cryo-EM structure of rotavirus B NSP2 reveals its unique tertiary architecture**

**Sebastian Chamera<sup>1</sup>, Krzysztof Wycisk<sup>1</sup>, Mariusz Czarnocki-Cieciura<sup>1</sup>, and Marcin**

**Nowotny<sup>1,#</sup>**

1. Laboratory of Protein Structure, International Institute of Molecular and Cell Biology, Warsaw 02-109,  
Poland

# Adress correspondence to Marcin Nowotny, [mnowotny@iimcb.gov.pl](mailto:mnowotny@iimcb.gov.pl)

## **Supplemental information**

### **FIGURES:**

**Supplemental Figure S1. RVB NSP2 cryo-EM data processing**

**Supplemental Figure S2. NSP2 cryo-EM map**

### **TABLES:**

**Supplemental Table S1. Data collection and processing**

**Supplemental Table S2. Refinement and validation statistics**

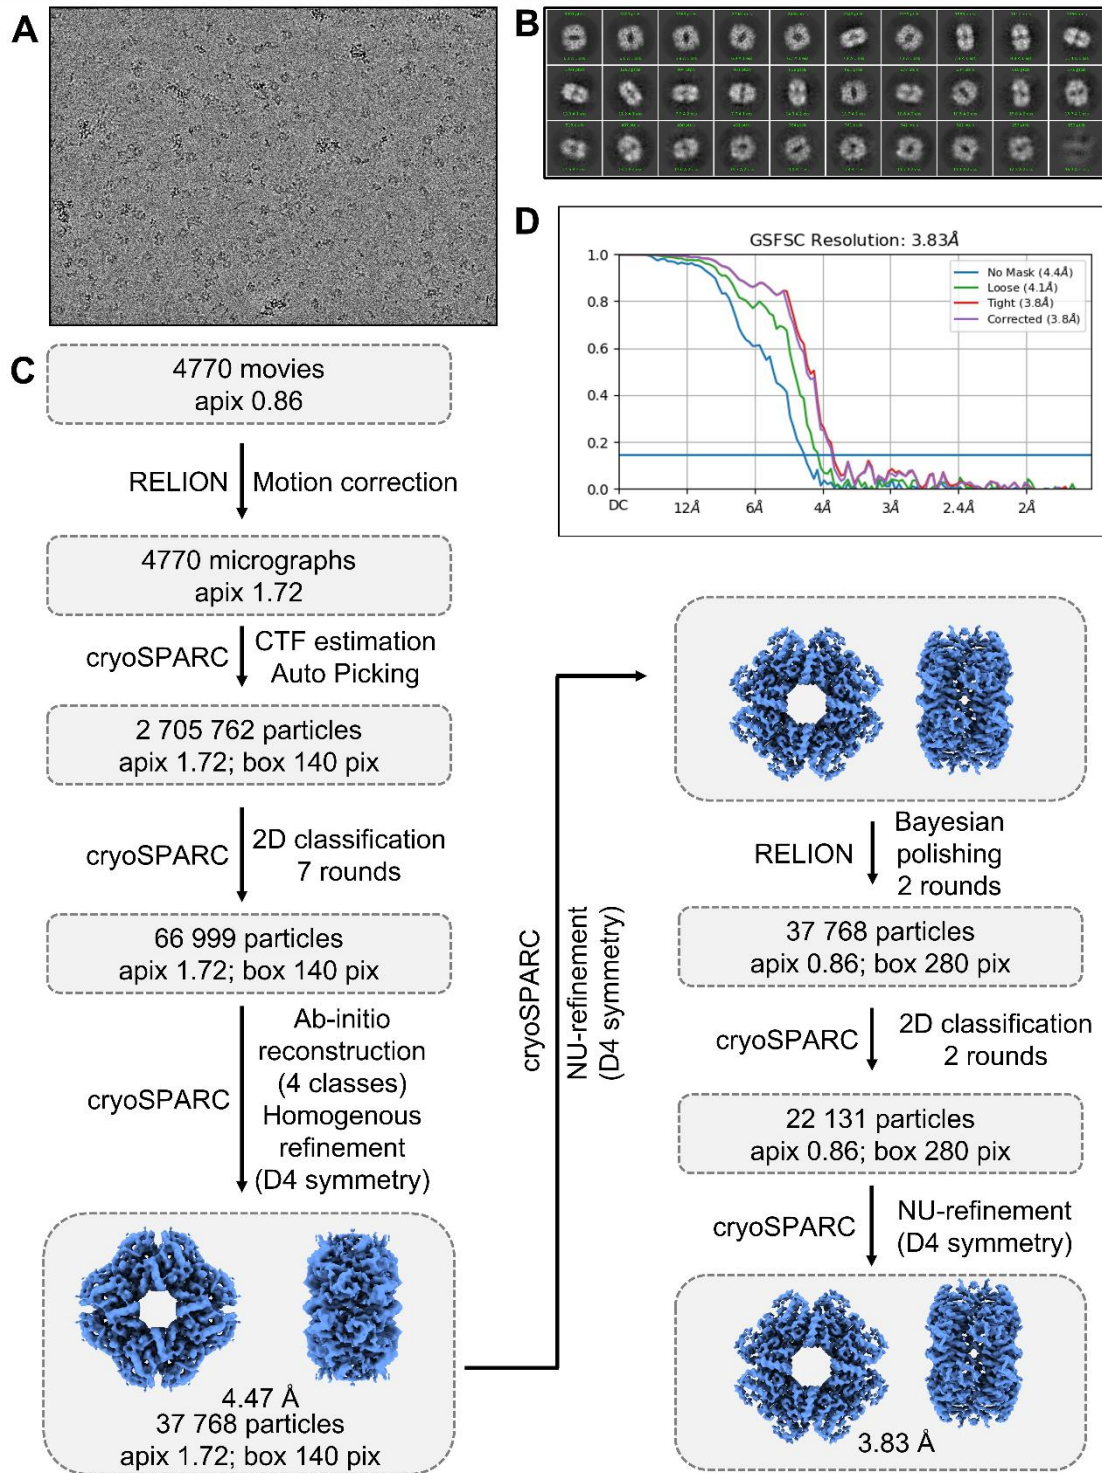

Supplemental Figure S1. **RVB NSP2 cryo-EM data processing.** (A) Representative micrograph. (B) Representative two-dimensional classes after several rounds of two-dimensional classification. (C) Three-dimensional reconstruction pipeline.

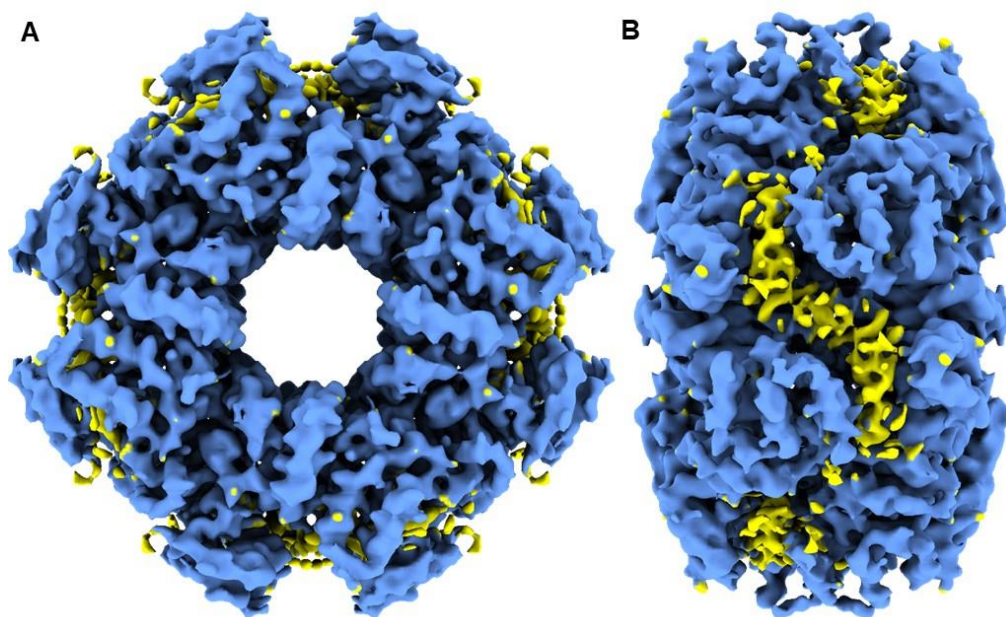

Supplemental Figure S2. **NSP2 cryo-EM map.** (A) Four-fold symmetry and (B) two-fold symmetry views of RVB NSP2 (blue) with an additional density that may correspond to the RNA oligonucleotide (yellow).

Supplemental Table S1. **Data collection and processing**

|                                           |                                  |
|-------------------------------------------|----------------------------------|
| Microscope                                | Titan Krios G3i                  |
| Camera                                    | Gatan K3                         |
| Energy filter                             | Gatan BioQuantum with 20 eV slit |
| Voltage (kV)                              | 300                              |
| Magnification                             | 105 000x                         |
| Electron exposure (e/Å <sup>2</sup> )     | 40                               |
| Defocus range (µm)                        | -2.5, -2.0, -1.5                 |
| Pixel size (Å)                            | 0.86                             |
| Initial particle images (no.)             | 2 705 762                        |
| Final particle images (no.)               | 22 131                           |
| Symmetry imposed                          | D4                               |
| Resolution at 0.143 FSC (masked, Å)       | 3.83                             |
| Map sharpening B factor (Å <sup>2</sup> ) | -201.7                           |
| EMBD accession code                       | EMD-17323                        |

Supplemental Table S2. **Refinement and validation statistics**

|                                                     |                     |
|-----------------------------------------------------|---------------------|
| PDB accession code                                  | 8P00                |
| Number of non-hydrogen atoms                        | 16992               |
| Protein residues                                    | 2376                |
| Bonds (RMSD): Length (Å)                            | 0.002               |
| Bonds (RMSD): Angles (°)                            | 0.581               |
| Validation: Rotamer outliers (%)                    | 0.06                |
| Ramachandran plot: Outliers / Allowed / Favored (%) | 0.00 / 4.58 / 95.42 |
